# Supplementary material for: Evidence of diverse animal exploitation during the Middle Paleolithic at Ghar-e Boof (southern Zagros)
Source: PubMed Central journal article supplement (PMC10624823; doi:10.1038/s41598-023-45974-8), 2023-11-03
Supplement: 41598_2023_45974_MOESM1_ESM.pdf [file 41598_2023_45974_MOESM1_ESM.pdf]

## SUPPLEMENTARY INFORMATION

### **Evidence of diverse animal exploitation during the Middle Paleolithic at Ghar-e Boof (southern Zagros)**

Mario Mata-González<sup>1,2\*</sup>, Britt M. Starkovich<sup>1,3</sup>, Mohsen Zeidi<sup>3,4</sup>, and Nicholas J. Conard<sup>1,3,4</sup>

<sup>1</sup>Institute for Archaeological Sciences, University of Tübingen, Hölderlinstr. 12, 72074 Tübingen, Germany

<sup>2</sup>Department of Anthropology, University of Connecticut, Unit 1176, 354 Mansfield Road, Storrs, CT, 06269, USA.

<sup>3</sup>Senckenberg Centre for Human Evolution and Paleoenvironment (SHEP), Hölderlinstr. 12, 72074 Tübingen, Germany

<sup>4</sup>Department of Early Prehistory and Quaternary Ecology, University of Tübingen, Schloss Hohentübingen, D-72070 Tübingen, Germany

\*Corresponding author:

*E-mail address:* [mario.mata-gonzalez@student.uni-tuebingen.de](mailto:mario.mata-gonzalez@student.uni-tuebingen.de)

**Table S1.** Ghar-e Boof. Summary of available stratigraphic information, including sedimentological characteristics, thickness, dating and cultural affiliations by archaeological horizon (AH). Table from Blanco-Lapaz et al.<sup>1</sup> and references therein.

| AH   | Sedimentological characteristics                                                                                                           | Thickness   | Dates (yr. BP)                          | Cultural affiliations                                             |
|------|--------------------------------------------------------------------------------------------------------------------------------------------|-------------|-----------------------------------------|-------------------------------------------------------------------|
| I    | Mixed, gray, ashy silts of the surface and subsurface                                                                                      | 5 to 20 cm  | -                                       | Historical periods (Late Sassanid and Early Islamic)              |
| II   | In-situ laminated ashy silt layers of black, red, orange, yellow, gray, white and various brown hues                                       | 100 cm      |                                         |                                                                   |
| IIa  | Dark brown/gray ashy silts                                                                                                                 | 15 cm       |                                         |                                                                   |
| IIb  | Medium brown ashy silts to a light, gray/brown silts. Massive geogenic layer (IIb.1) of limestone cobbles located at the bottom of this AH | 10 cm       | 1,225-1,260 cal.                        | Mainly Epipaleolithic (Zarzian), but pottery sherds still present |
| III  | Homogenous light gray to yellow-brown ashy silts, similar to loess. Ample lateral variation                                                | 10 to 70 cm | 35,152 ± 368 cal.                       | Early UP (Rostamian)                                              |
| IIIa | Medium brown ashy silts                                                                                                                    | 20 cm       | -                                       |                                                                   |
| IIIb | Light brown ashy silts with alternating gray-black, white-brown, and light brown silts                                                     | 60 cm       | 38,994 ± 1419 cal.<br>39,949 ± 921 cal. |                                                                   |
| IIIc | Light brown silts, starting with an irregular cemented crust                                                                               | 20 cm       | -                                       |                                                                   |
| IV   | Light brown silts with small angular fragments of limestone                                                                                | 25 cm       | 41,355 ± 326 cal.                       |                                                                   |
| IVa  | Brown silts with small angular fragments of limestone                                                                                      | 15 cm       | 40 – 42 k                               |                                                                   |
| IVb  | Light brown silts, but less rocky than IV and IVa                                                                                          | 15 cm       | -                                       |                                                                   |
| IVc  | Fine rocky brown silts                                                                                                                     | 10 cm       | -                                       |                                                                   |
| IVd  | Fine rocky light brown silts                                                                                                               | 15 cm       | 45 – 48 k                               |                                                                   |
| V    | Light brown but less rocky silts, underlaid by a thin dark brown band and then by a medium brown silty sediment                            | 40 cm       | 46 – 50 k                               |                                                                   |
| Va   | Mostly light brown silty matrix with many small sharp-edged pieces of limestone, though thin bands of brown silts were observed            | 60 cm       | 51 – 55 k<br>55 – 59 k                  | MP                                                                |
| Vb   | Still mostly rocky light brown silty matrix, along with red brown silts                                                                    | 25 cm       | 56 – 60 k                               |                                                                   |
| Vc   | Light brown silts                                                                                                                          | 15 cm       | 59 – 64 k                               |                                                                   |
| Vd   | Light brown to yellow brown silts                                                                                                          | 25 cm       | 63 – 70 k                               |                                                                   |
| VI   | Homogeneous brown to gray-light yellow brown silts, with small limestone clasts, laying over the bedrock                                   | 80 cm       | 72 – 78 k                               |                                                                   |
|      |                                                                                                                                            |             | 74 – 81 k                               |                                                                   |

**Table S2.** MP faunal assemblages from Ghar-e Boof. Number of identified specimens (NISP) and minimum number of individuals (MNI) by AH for each taxon or body size group.

| AH                                        | IVc       |          | IVd       |          | V          |          | Va         |          | Vb         |          | Vc         |          | Vd        |          | VI         |          | Total      |                 |
|-------------------------------------------|-----------|----------|-----------|----------|------------|----------|------------|----------|------------|----------|------------|----------|-----------|----------|------------|----------|------------|-----------------|
| Taxon                                     | NISP      | MNI      | NISP      | MNI      | NISP       | MNI      | NISP       | MNI      | NISP       | MNI      | NISP       | MNI      | NISP      | MNI      | NISP       | MNI      | NISP       | MNI             |
| <b>Ungulates</b>                          |           |          |           |          |            |          |            |          |            |          |            |          |           |          |            |          |            |                 |
| Small ungulate                            | 0         | NA*      | 0         | NA       | 4          | NA       | 17         | NA       | 11         | NA       | 5          | NA       | 0         | NA       | 15         | NA       | 52         | NA              |
| Gazelle ( <i>Gazella</i> sp.)             | 2         | 1        | 0         | 0        | 1          | 1        | 1          | 1        | 1          | 1        | 0          | 0        | 6         | 1        | 6          | 1        | 17         | 6               |
| Small/medium ungulate                     | 2         | NA       | 1         | NA       | 2          | NA       | 9          | NA       | 11         | NA       | 9          | NA       | 4         | NA       | 16         | NA       | 54         | NA              |
| Medium ungulate                           | 35        | NA       | 7         | NA       | 52         | NA       | 111        | NA       | 57         | NA       | 36         | NA       | 16        | NA       | 112        | NA       | 426        | NA              |
| Sheep ( <i>Ovis</i> sp.)                  | 0         | 0        | 0         | 0        | 0          | 0        | 2          | 1        | 4          | 1        | 0          | 0        | 0         | 0        | 0          | 0        | 6          | 2               |
| Wild goat ( <i>Capra aegagrus</i> )       | 10        | 1        | 0         | 0        | 4          | 1        | 2          | 1        | 1          | 1        | 7          | 1        | 0         | 0        | 9          | 2        | 33         | 7               |
| Sheep/goat ( <i>Ovis/Capra</i> )          | 2         | 1        | 3         | 1        | 4          | 1        | 11         | 1        | 9          | 1        | 23         | 2        | 1         | 1        | 26         | 1        | 79         | 9               |
| Medium/large ungulate                     | 0         | NA       | 2         | NA       | 0          | NA       | 4          | NA       | 0          | NA       | 0          | NA       | 1         | NA       | 3          | NA       | 10         | NA              |
| Large ungulate                            | 3         | NA       | 0         | NA       | 3          | NA       | 10         | NA       | 2          | NA       | 2          | NA       | 0         | NA       | 2          | NA       | 22         | NA              |
| Red deer ( <i>Cervus elaphus</i> )        | 1         | 1        | 0         | 0        | 0          | 0        | 0          | 0        | 0          | 0        | 0          | 0        | 0         | 0        | 0          | 0        | 1          | 1               |
| Wild pig ( <i>Sus scrofa</i> )            | 0         | 0        | 0         | 0        | 0          | 0        | 0          | 0        | 0          | 0        | 0          | 0        | 0         | 0        | 1          | 1        | 1          | 1               |
| Equid ( <i>Equus</i> sp.)                 | 0         | 0        | 0         | 0        | 0          | 0        | 0          | 0        | 1          | 1        | 0          | 0        | 0         | 0        | 0          | 0        | 1          | 1               |
| Large/very large ungulate                 | 1         | NA       | 0         | NA       | 0          | NA       | 0          | NA       | 0          | NA       | 1          | NA       | 0         | NA       | 1          | NA       | 3          | NA              |
| Very large ungulate                       | 0         | NA       | 0         | NA       | 1          | NA       | 1          | NA       | 1          | NA       | 0          | NA       | 0         | NA       | 0          | NA       | 3          | NA              |
| Wild cattle ( <i>Bos primigenius</i> )    | 0         | 0        | 0         | 0        | 0          | 0        | 0          | 0        | 0          | 0        | 0          | 0        | 0         | 0        | 2          | 1        | 2          | 1               |
| <b>Carnivores</b>                         |           |          |           |          |            |          |            |          |            |          |            |          |           |          |            |          |            |                 |
| Red fox ( <i>Vulpes vulpes</i> )          | 0         | 0        | 0         | 0        | 0          | 0        | 1          | 1        | 0          | 0        | 0          | 0        | 0         | 0        | 0          | 0        | 1          | 1               |
| Large carnivore                           | 0         | NA       | 0         | NA       | 0          | NA       | 1          | NA       | 0          | NA       | 0          | NA       | 0         | NA       | 0          | NA       | 1          | NA              |
| Leopard ( <i>Panthera cf. pardus</i> )    | 0         | 0        | 1         | 1        | 4          | 1        | 0          | 0        | 0          | 0        | 0          | 0        | 0         | 0        | 0          | 0        | 5          | 2(1)**          |
| <b>Reptiles</b>                           |           |          |           |          |            |          |            |          |            |          |            |          |           |          |            |          |            |                 |
| Tortoise ( <i>Testudo</i> sp.)            | 8         | 1        | 2         | 1        | 23         | 1        | 57         | 2        | 34         | 1        | 27         | 1        | 10        | 1        | 0          | 0        | 161        | 8               |
| <b>Birds</b>                              |           |          |           |          |            |          |            |          |            |          |            |          |           |          |            |          |            |                 |
| Medium birds                              | 11        | NA       | 0         | NA       | 3          | NA       | 12         | NA       | 9          | NA       | 6          | NA       | 3         | NA       | 5          | NA       | 49         | NA              |
| Partridge ( <i>Alectoris cf. chukar</i> ) | 5         | 2        | 1         | 1        | 1          | 1        | 1          | 1        | 3          | 1        | 0          | 0        | 0         | 0        | 1          | 1        | 12         | 7               |
| Large birds                               | 1         | NA       | 0         | NA       | 0          | NA       | 1          | NA       | 0          | NA       | 0          | NA       | 0         | NA       | 0          | NA       | 2          | NA              |
| <b>Total</b>                              | <b>81</b> | <b>7</b> | <b>17</b> | <b>4</b> | <b>102</b> | <b>6</b> | <b>241</b> | <b>8</b> | <b>144</b> | <b>7</b> | <b>116</b> | <b>4</b> | <b>41</b> | <b>3</b> | <b>199</b> | <b>7</b> | <b>941</b> | <b>46(45)**</b> |

\*NA (Not Applicable).

\*\*Although we have documented Leopard's remains in AHs IVd and V, all of them were recovered relatively close to each other, just in the transition between these 2 layers, within an interval of 7 cm in depth. Therefore, they may belong to just 1 individual, instead of 2.

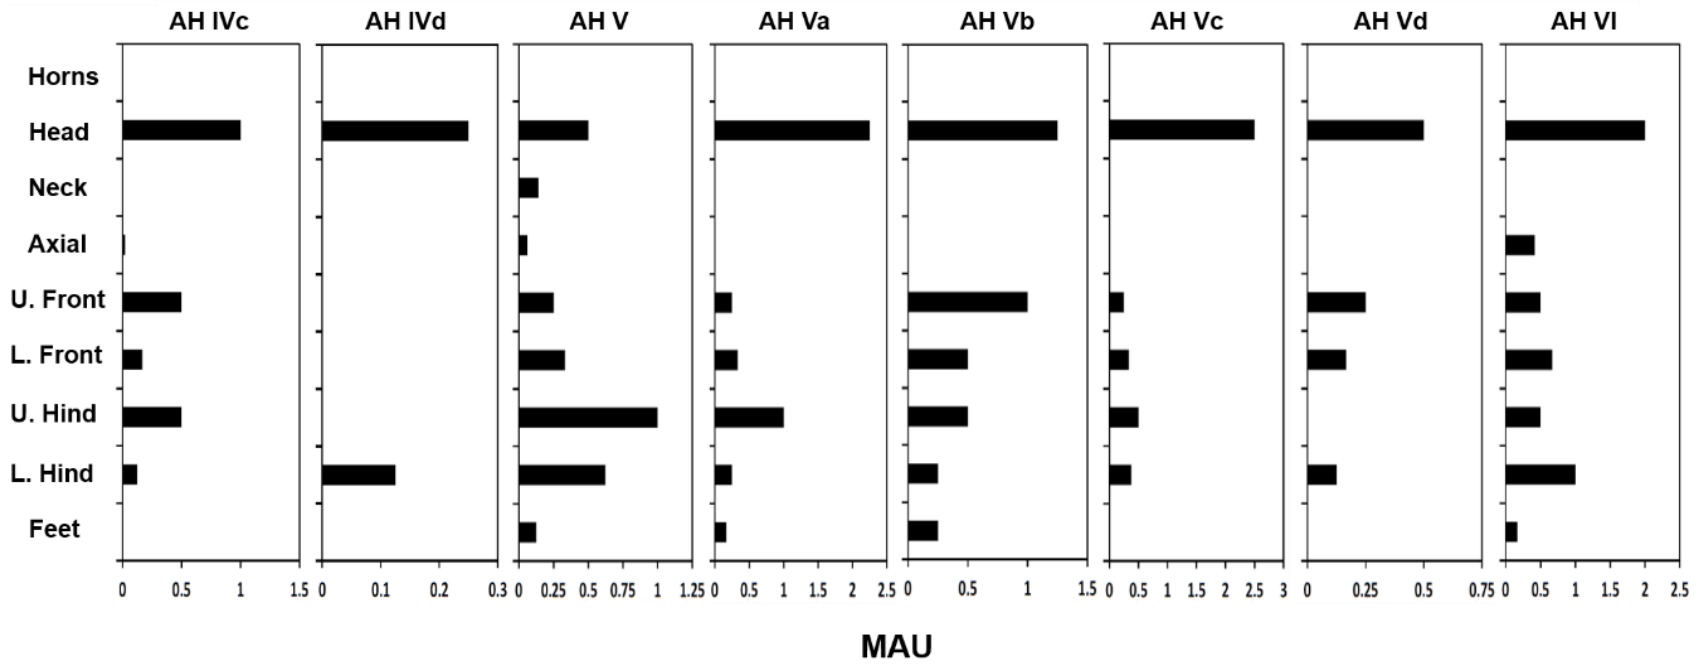

**Fig. S1.** MP faunal assemblages from Ghar-e Boof. MAU values for each skeletal region of caprines/medium ungulates by AH. Data from Table S4.

**Table S3.** MP faunal assemblages from Ghar-e Boof. NISP, MNE and MAU counts for caprine/medium ungulate skeletal elements and by AH. As a comparison, the data are presented along with a standard goat skeleton (\*). Horizontal lines indicate the elements that encompasses each anatomical region.

| Elements     | ST* |      | IVc |      |      | IVd |     |      | V   |      |      | Va  |     |      | Vb  |     |      | Vc  |     |      | Vd  |     |      | VI  |      |
|--------------|-----|------|-----|------|------|-----|-----|------|-----|------|------|-----|-----|------|-----|-----|------|-----|-----|------|-----|-----|------|-----|------|
|              | MNE | NISP | MNE | MAU  | NISP | MNE | MAU | NISP | MNE | MAU  | NISP | MNE | MAU | NISP | MNE | MAU | NISP | MNE | MAU | NISP | MNE | MAU | NISP | MNE | MAU  |
| Horn         | 2   | 0    | 0   | 0.0  | 0    | 0   | 0.0 | 0    | 0   | 0.0  | 0    | 0   | 0.0 | 0    | 0   | 0.0 | 0    | 0   | 0.0 | 0    | 0   | 0.0 | 0    | 0   | 0.0  |
| 1/2 Cranium  | 2   | 4    | 3   | 1.5  | 1    | 1   | 0.5 | 1    | 1   | 0.5  | 8    | 7   | 3.5 | 5    | 4   | 2.0 | 8    | 8   | 4.0 | 2    | 2   | 1.0 | 8    | 7   | 3.5  |
| 1/2 Mandible | 2   | 1    | 1   | 0.5  | 0    | 0   | 0.0 | 2    | 1   | 0.5  | 2    | 2   | 1.0 | 2    | 1   | 0.5 | 4    | 2   | 1.0 | 0    | 0   | 0.0 | 5    | 1   | 0.5  |
| Atlas        | 1   | 0    | 0   | 0.0  | 0    | 0   | 0.0 | 0    | 0   | 0.0  | 0    | 0   | 0.0 | 0    | 0   | 0.0 | 0    | 0   | 0.0 | 0    | 0   | 0.0 | 0    | 0   | 0.0  |
| Axis         | 1   | 0    | 0   | 0.0  | 0    | 0   | 0.0 | 0    | 0   | 0.0  | 0    | 0   | 0.0 | 0    | 0   | 0.0 | 0    | 0   | 0.0 | 0    | 0   | 0.0 | 0    | 0   | 0.0  |
| Cervical     | 5   | 0    | 0   | 0.0  | 0    | 0   | 0.0 | 1    | 1   | 0.2  | 0    | 0   | 0.0 | 0    | 0   | 0.0 | 0    | 0   | 0.0 | 0    | 0   | 0.0 | 0    | 0   | 0.0  |
| Thoracic     | 13  | 0    | 0   | 0.0  | 0    | 0   | 0.0 | 0    | 0   | 0.0  | 0    | 0   | 0.0 | 0    | 0   | 0.0 | 0    | 0   | 0.0 | 0    | 0   | 0.0 | 0    | 0   | 0.0  |
| Lumbar       | 6   | 0    | 0   | 0.0  | 0    | 0   | 0.0 | 1    | 1   | 0.17 | 0    | 0   | 0.0 | 0    | 0   | 0.0 | 0    | 0   | 0.0 | 0    | 0   | 0.0 | 1    | 1   | 0.2  |
| Sacrum       | 1   | 0    | 0   | 0.0  | 0    | 0   | 0.0 | 0    | 0   | 0.0  | 0    | 0   | 0.0 | 0    | 0   | 0.0 | 0    | 0   | 0.0 | 0    | 0   | 0.0 | 0    | 0   | 0.0  |
| Rib          | 26  | 3    | 1   | <0.1 | 0    | 0   | 0.0 | 1    | 1   | <0.1 | 0    | 0   | 0.0 | 0    | 0   | 0.0 | 0    | 0   | 0.0 | 0    | 0   | 0.0 | 1    | 1   | <0.1 |
| Innominate   | 2   | 0    | 0   | 0.0  | 0    | 0   | 0.0 | 1    | 1   | 0.5  | 0    | 0   | 0.0 | 0    | 0   | 0.0 | 0    | 0   | 0.0 | 0    | 0   | 0.0 | 0    | 0   | 0.0  |
| Scapula      | 2   | 0    | 0   | 0.0  | 0    | 0   | 0.0 | 0    | 0   | 0.0  | 0    | 0   | 0.0 | 1    | 1   | 0.5 | 0    | 0   | 0.0 | 0    | 0   | 0.0 | 0    | 0   | 0.0  |
| Humerus      | 2   | 6    | 2   | 1.0  | 0    | 0   | 0.0 | 3    | 1   | 0.5  | 5    | 1   | 0.5 | 5    | 3   | 1.5 | 2    | 1   | 0.5 | 2    | 1   | 0.5 | 6    | 2   | 1.0  |
| Radius       | 2   | 1    | 1   | 0.5  | 0    | 0   | 0.0 | 5    | 1   | 0.5  | 12   | 1   | 0.5 | 3    | 1   | 0.5 | 1    | 1   | 0.5 | 1    | 1   | 0.5 | 9    | 2   | 1.0  |
| Ulna         | 2   | 0    | 0   | 0.0  | 0    | 0   | 0.0 | 3    | 1   | 0.5  | 2    | 1   | 0.5 | 2    | 1   | 0.5 | 1    | 1   | 0.5 | 0    | 0   | 0.0 | 4    | 1   | 0.5  |
| Metacarpal   | 2   | 0    | 0   | 0.0  | 0    | 0   | 0.0 | 0    | 0   | 0.0  | 0    | 0   | 0.0 | 1    | 1   | 0.5 | 0    | 0   | 0.0 | 0    | 0   | 0.0 | 1    | 1   | 0.5  |
| Femur        | 2   | 1    | 1   | 0.5  | 0    | 0   | 0.0 | 5    | 2   | 1.0  | 11   | 2   | 1.0 | 1    | 1   | 0.5 | 1    | 1   | 0.5 | 0    | 0   | 0.0 | 6    | 1   | 0.5  |
| Patella      | 2   | 0    | 0   | 0.0  | 0    | 0   | 0.0 | 0    | 0   | 0.0  | 0    | 0   | 0.0 | 0    | 0   | 0.0 | 0    | 0   | 0.0 | 0    | 0   | 0.0 | 0    | 0   | 0.0  |
| Tibia        | 2   | 4    | 1   | 0.5  | 0    | 0   | 0.0 | 9    | 3   | 1.5  | 14   | 1   | 0.5 | 7    | 1   | 0.5 | 7    | 2   | 1.0 | 2    | 1   | 0.5 | 18   | 5   | 2.5  |
| Astragalus   | 2   | 0    | 0   | 0.0  | 0    | 0   | 0.0 | 0    | 0   | 0.0  | 0    | 0   | 0.0 | 0    | 0   | 0.0 | 0    | 0   | 0.0 | 0    | 0   | 0.0 | 0    | 0   | 0.0  |
| Calcaneum    | 2   | 0    | 0   | 0.0  | 0    | 0   | 0.0 | 1    | 1   | 0.5  | 0    | 0   | 0.0 | 0    | 0   | 0.0 | 0    | 0   | 0.0 | 0    | 0   | 0.0 | 2    | 2   | 1.0  |
| Metatarsal   | 2   | 0    | 0   | 0.0  | 1    | 1   | 0.5 | 1    | 1   | 0.5  | 3    | 1   | 0.5 | 1    | 1   | 0.5 | 1    | 1   | 0.5 | 0    | 0   | 0.0 | 3    | 1   | 0.5  |
| Phalanx 1    | 8   | 0    | 0   | 0.0  | 0    | 0   | 0.0 | 3    | 2   | 0.3  | 1    | 1   | 0.1 | 4    | 3   | 0.4 | 0    | 0   | 0.0 | 0    | 0   | 0.0 | 4    | 2   | 0.3  |
| Phalanx 2    | 8   | 0    | 0   | 0.0  | 0    | 0   | 0.0 | 2    | 1   | 0.1  | 4    | 3   | 0.4 | 2    | 2   | 0.3 | 0    | 0   | 0.0 | 0    | 0   | 0.0 | 2    | 2   | 0.3  |
| Phalanx 3    | 8   | 0    | 0   | 0.0  | 0    | 0   | 0.0 | 0    | 0   | 0.0  | 2    | 2   | 0.3 | 1    | 1   | 0.1 | 0    | 0   | 0.0 | 0    | 0   | 0.0 | 0    | 0   | 0.0  |
| Total        | 107 | 20   | 10  | -    | 2    | 2   | -   | 39   | 19  | -    | 64   | 22  | -   | 35   | 21  | -   | 25   | 17  | -   | 7    | 5   | -   | 70   | 29  | -    |

**Table S4.** MP faunal assemblages from Ghar-e Boof. NISP, MNE, MAU and %MAU for caprines/medium ungulates by element (for a more robust sample, we combined all the MP AHs), alongside MNEs for a standard goat skeleton (ST goat), Foot Utility Index (FUI; from<sup>2</sup>), standard Food Utility Index (sFUI; from<sup>3</sup>), Marrow Index (MI; from<sup>2</sup>), and Unsaturated Marrow Index (UMI; from<sup>4</sup>).

| Elements     | MNE ST<br>Goat | NISP | MNE | MAU  | %MAU  | FUI   | sFUI* | MI    | UMI  |
|--------------|----------------|------|-----|------|-------|-------|-------|-------|------|
| Horn         | 2              | 0    | 0   | 0.0  | 0.0   | NA**  | 1.0   | NA    | NA   |
| Cranium***   | 2              | 37   | 33  | 16.5 | 100.0 | 25.3  | 9.1   | NA    | NA   |
| Hemimandible | 2              | 16   | 8   | 4.0  | 24.2  | NA    | 31.1  | NA    | NA   |
| Atlas        | 1              | 0    | 0   | 0.0  | 0.0   | 9.1   | 10.2  | 0.0   | NA   |
| Axis         | 1              | 0    | 0   | 0.0  | 0.0   | 9.1   | 10.2  | 0.0   | NA   |
| Cervical     | 5              | 1    | 1   | 0.2  | 1.2   | 38.6  | 37.1  | 0.0   | NA   |
| Thoracic     | 13             | 0    | 0   | 0.0  | 0.0   | 47.4  | 47.3  | 0.0   | NA   |
| Lumbar       | 6              | 2    | 2   | 0.3  | 1.8   | 45.1  | 33.1  | 0.0   | NA   |
| Sacrum       | 1              | 0    | 0   | 0.0  | 0.0   | NA    | NA    | NA    | NA   |
| Rib          | 26             | 5    | 3   | 0.1  | 0.6   | 62.3  | 51.6  | 0.0   | NA   |
| Sternum      | 1              | 0    | 0   | 0.0  | 0.0   | 32.4  | 66.6  | 0.0   | NA   |
| Innominate   | 2              | 1    | 1   | 0.5  | 3.0   | 34.7  | 49.3  | 3.9   | NA   |
| Scapula      | 2              | 1    | 1   | 0.5  | 3.0   | 27.5  | 44.7  | 1.3   | NA   |
| Humerus      | 2              | 29   | 11  | 5.5  | 33.3  | 27.5  | 40.8  | 79.8  | 22.8 |
| Radius       | 2              | 32   | 8   | 4.0  | 24.2  | 19.2  | 23.0  | 58.9  | 26.3 |
| Ulna         | 2              | 12   | 5   | 2.5  | 15.2  | NA    | NA    | NA    | NA   |
| Metacarpal   | 2              | 2    | 2   | 1.0  | 6.1   | 6.5   | 8.1   | 17.3  | 19.6 |
| Carpals      | 12             | 3    | 3   | 0.3  | 1.8   | 10.7  | 12.7  | 0.0   | 0.9  |
| Femur        | 2              | 25   | 8   | 4.0  | 24.2  | 100.0 | 100.0 | 87.0  | 34.0 |
| Patella      | 2              | 0    | 0   | 0.0  | 0.0   | NA    | NA    | NA    | NA   |
| Tibia        | 2              | 61   | 14  | 7.0  | 42.4  | 57.7  | 53.5  | 100.0 | 51.1 |
| Astragalus   | 2              | 0    | 0   | 0.0  | 0.0   | 30.0  | 27.7  | 0.0   | 0.9  |
| Calcaneum    | 2              | 3    | 3   | 1.5  | 9.1   | 30.0  | 27.7  | 0.0   | 2.6  |
| Metatarsal   | 2              | 10   | 6   | 3.0  | 18.2  | 16.1  | 17.5  | 21.1  | 46.5 |
| Tarsals      | 8              | 1    | 1   | 0.1  | 0.6   | 30.0  | 27.7  | 0.0   | 0.9  |
| Phalanx 1    | 8              | 12   | 8   | 1.0  | 6.1   | 8.8   | 8.6   | 3.5   | 3.7  |
| Phalanx 2    | 8              | 10   | 8   | 1.0  | 6.1   | 8.8   | 8.6   | 3.5   | 1.8  |
| Phalanx 3    | 8              | 3    | 3   | 0.4  | 2.4   | 8.8   | 8.6   | 3.5   | 0.9  |

\*We evaluated long bones as whole elements, so for sFUI we averaged the values provided by Metcalfe and Jones<sup>3</sup> for distal and medial epiphyses.

\*\*NA (Not Applicable).

\*\*\*MNE values for crania were also estimated for both left and right sides separately, and that is why the “cranium” of a standard goat skeleton has “2 MNEs”.

**Table S5.** Ghar-e Boof. Spearman’s rank-order correlation values for the relationship %MAU and utility indices. Data from Table S4.

| Utility indices | <i>n</i> | <i>r<sub>s</sub></i> | <i>p</i> |
|-----------------|----------|----------------------|----------|
| FUI             | 23       | -0.070               | 0.751    |
| sFUI            | 25       | 0.053                | 0.803    |
| MI              | 22       | 0.864                | < 0.001* |
| UMI             | 13       | 0.906                | < 0.001* |

\*Asterisks indicate statistically significant correlations.

**Table S6.** Middle Paleolithic faunal assemblages of Ghar-e Boof. Ratios between ungulate tooth and bone-based MNE by AH. All ungulate taxa are included for a more robust dataset.

| AH  | Tooth MNE | Bone MNE | Tooth:bone MNE |
|-----|-----------|----------|----------------|
| IVc | 2         | 4        | 0.5            |
| IVd | 1         | 1        | 1.0            |
| V   | 1         | 1        | 1.0            |
| Va  | 1         | 10       | 0.1            |
| Vb  | 2         | 9        | 0.2            |
| Vc  | 3         | 10       | 0.3            |
| Vd  | 1         | 2        | 0.5            |
| VI  | 3         | 9        | 0.3            |

**Table S7.** MP faunal assemblages from Ghar-e Boof. Frequencies of sedimentological alterations, weathering damage and gnawing documented on faunal specimens by AH.

| AH<br>Type of damage                | IVc  |       | IVd  |       | V    |       | Va   |       | Vb   |       | Vc   |       | Vd   |       | VI   |       | Total |       |
|-------------------------------------|------|-------|------|-------|------|-------|------|-------|------|-------|------|-------|------|-------|------|-------|-------|-------|
|                                     | NISP | %     | NISP | %     | NISP | %     | NISP | %     | NISP | %     | NISP | %     | NISP | %     | NISP | %     | NISP  | %     |
| <b>Sedimentological alterations</b> |      |       |      |       |      |       |      |       |      |       |      |       |      |       |      |       |       |       |
| None                                | 58   | 71.6  | 16   | 94.1  | 63   | 61.8  | 185  | 76.8  | 109  | 75.7  | 66   | 56.9  | 32   | 78.1  | 196  | 98.5  | 725   | 77.1  |
| Sediment concretions                | 23   | 28.4  | 1    | 5.9   | 39   | 38.2  | 55   | 22.8  | 33   | 22.9  | 36   | 31.0  | 9    | 22.0  | 3    | 1.5   | 199   | 21.2  |
| Sediment Crushing                   | 1    | 1.2   | 0    | 0.0   | 0    | 0.0   | 1    | 0.4   | 2    | 1.4   | 14   | 12.1  | 0    | 0.0   | 0    | 0.0   | 18    | 1.9   |
| Total                               | 81   | 100.0 | 17   | 100.0 | 102  | 100.0 | 241  | 100.0 | 144  | 100.0 | 116  | 100.0 | 41   | 100.0 | 199  | 100.0 | 941   | 100.0 |
| <b>Weathering*</b>                  |      |       |      |       |      |       |      |       |      |       |      |       |      |       |      |       |       |       |
| None                                | 32   | 44.4  | 6    | 40.0  | 62   | 64.6  | 157  | 69.5  | 87   | 65.4  | 70   | 77.8  | 30   | 90.9  | 95   | 56.6  | 539   | 64.7  |
| Fine linear cracks                  | 0    | 0.0   | 0    | 0.0   | 0    | 0.0   | 4    | 1.8   | 0    | 0.0   | 2    | 2.2   | 0    | 0.0   | 3    | 1.8   | 9     | 1.1   |
| Fine cracks, some "open"            | 0    | 0.0   | 0    | 0.0   | 3    | 3.1   | 3    | 1.3   | 2    | 1.5   | 0    | 0.0   | 0    | 0.0   | 4    | 2.4   | 12    | 1.4   |
| Chemical weathering                 | 39   | 54.2  | 8    | 53.3  | 32   | 33.3  | 63   | 27.9  | 44   | 33.1  | 18   | 20.0  | 3    | 9.1   | 68   | 40.5  | 275   | 33.0  |
| Root etching                        | 2    | 2.8   | 2    | 13.3  | 2    | 2.1   | 0    | 0.0   | 1    | 0.8   | 0    | 0.0   | 0    | 0.0   | 2    | 1.2   | 9     | 1.1   |
| Total                               | 72   | 100.0 | 15   | 100.0 | 96   | 100.0 | 226  | 100.0 | 133  | 100.0 | 90   | 100.0 | 33   | 100.0 | 168  | 100.0 | 833   | 100.0 |
| <b>Gnawing*</b>                     |      |       |      |       |      |       |      |       |      |       |      |       |      |       |      |       |       |       |
| None                                | 68   | 94.4  | 13   | 86.7  | 79   | 82.3  | 221  | 97.8  | 131  | 98.5  | 88   | 97.8  | 33   | 100.0 | 153  | 91.1  | 786   | 94.4  |
| Carnivore bite marks                | 1    | 1.4   | 0    | 0.0   | 3    | 3.1   | 0    | 0.0   | 0    | 0.0   | 0    | 0.0   | 0    | 0.0   | 6    | 3.6   | 10    | 1.2   |
| Potential carnivore bite marks      | 1    | 1.4   | 0    | 0.0   | 3    | 3.1   | 2    | 0.9   | 1    | 0.7   | 0    | 0.0   | 0    | 0.0   | 5    | 3.0   | 12    | 1.4   |
| Rodent gnawing                      | 2    | 2.7   | 2    | 13.3  | 12   | 112.5 | 3    | 1.3   | 1    | 0.7   | 1    | 1.1   | 0    | 0.0   | 4    | 2.4   | 25    | 3.0   |
| Potential rodent gnawing            | 0    | 0.0   | 0    | 0.0   | 0    | 0.0   | 0    | 0.0   | 0    | 0.0   | 1    | 1.1   | 0    | 0.0   | 1    | 0.6   | 2     | 0.2   |
| Possibly digested                   | 0    | 0.0   | 0    | 0.0   | 0    | 0.0   | 0    | 0.0   | 1    | 0.7   | 0    | 0.0   | 0    | 0.0   | 0    | 0.0   | 1     | 0.1   |
| Total                               | 72   | 100.0 | 15   | 100.0 | 96   | 100.0 | 226  | 100.0 | 133  | 100.0 | 90   | 100.0 | 33   | 100.0 | 168  | 100.0 | 833   | 100.0 |

\*Tooth elements are excluded from these analyses.



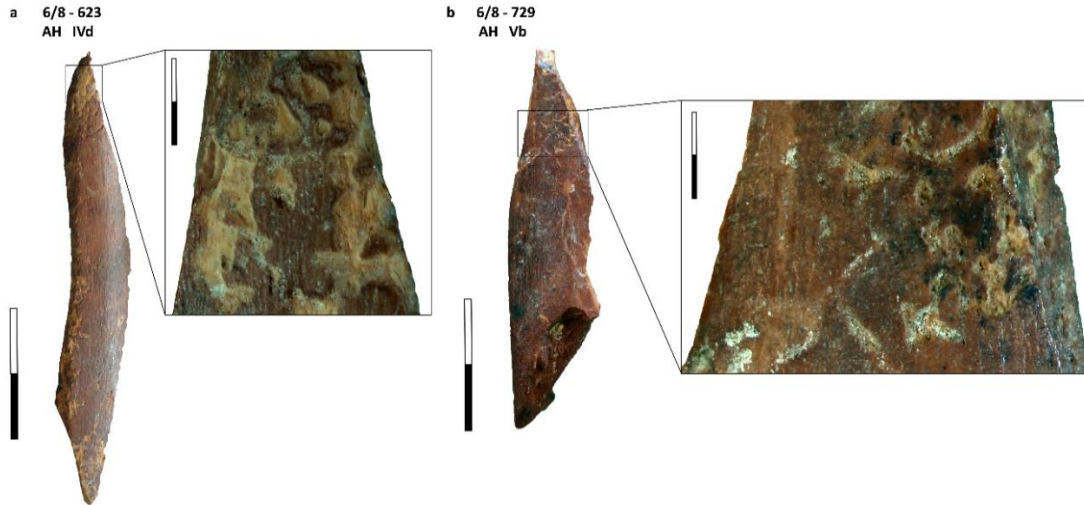

**Fig. S2.** MP faunal remains from Ghar-e Boof exhibiting chemical weathering: a) medium-bodied ungulate long bone shaft fragment; and b) medium ungulate tibia. Scale: general view = 10 mm; closer-up view = 2 mm.

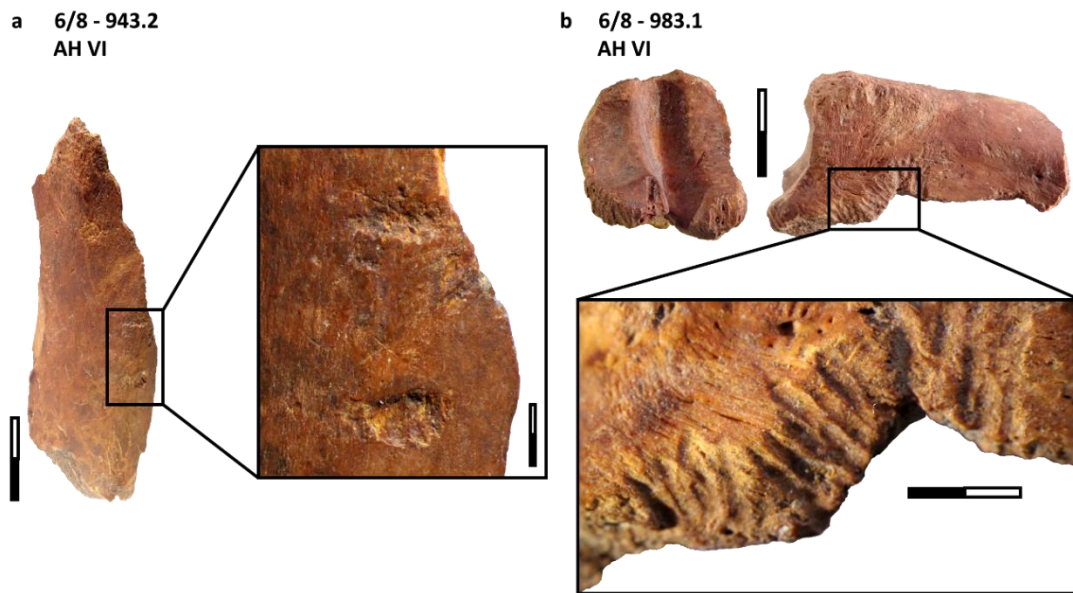

**Fig. S3.** MP faunal remains from Ghar-e Boof: a) medium-bodied ungulate long bone shaft fragment with carnivore bite marks; b) wild goat first phalanx with rodent gnawing. Scale: general view = 10 mm; closer-up view = 2 mm.

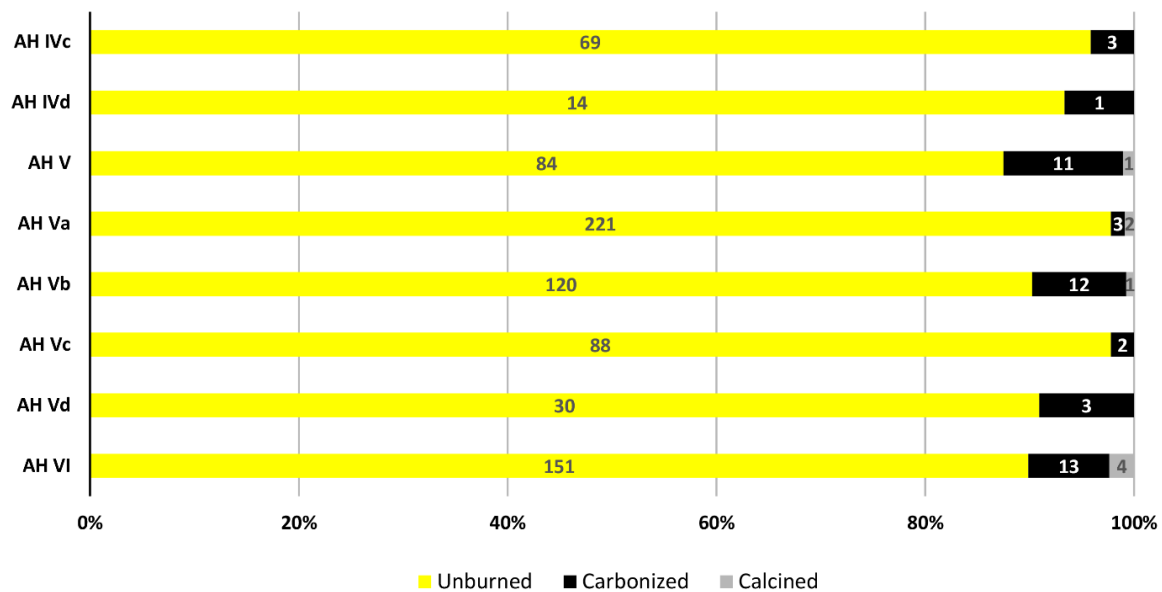

**Fig. S4.** MP faunal assemblages from Ghar-e Boof. NISP count and %NISP of unburned and burned (carbonized/calcined) bones by AH.

**Table S8.** MP faunal assemblages from Ghar-e Boof. Butchery damage on faunal specimens by AH. Tooth remains are excluded.

| Butchery damage         | <i>Ivc</i> |       | <i>Ivd</i> |       | <i>V</i> |       | <i>Va</i> |       | <i>Vb</i> |       | <i>Vc</i> |       | <i>Vd</i> |       | <i>VI</i> |       | <i>Total</i> |       |
|-------------------------|------------|-------|------------|-------|----------|-------|-----------|-------|-----------|-------|-----------|-------|-----------|-------|-----------|-------|--------------|-------|
|                         | NISP       | %     | NISP       | %     | NISP     | %     | NISP      | %     | NISP      | %     | NISP      | %     | NISP      | %     | NISP      | %     | NISP         | %     |
| Impact damage           | 8          | 11.1  | 1          | 6.7   | 3        | 3.1   | 16        | 7.1   | 8         | 6.0   | 9         | 10.0  | 6         | 18.2  | 20        | 11.9  | 71           | 8.5   |
| Potential impact damage | 0          | 0.0   | 0          | 0.0   | 0        | 0.0   | 0         | 0.0   | 0         | 0.0   | 0         | 0.0   | 2         | 6.1   | 1         | 0.6   | 3            | 0.4   |
| Transverse fracture     | 6          | 8.3   | 0          | 0.0   | 8        | 8.3   | 10        | 4.4   | 14        | 10.5  | 5         | 5.6   | 0         | 0.0   | 11        | 6.6   | 54           | 6.5   |
| Split/spiral fracture   | 26         | 36.1  | 8          | 53.3  | 33       | 34.4  | 98        | 43.4  | 47        | 35.3  | 35        | 38.9  | 10        | 30.3  | 89        | 53.0  | 346          | 41.5  |
| Cut marks               | 6          | 8.3   | 4          | 26.7  | 19       | 19.8  | 48        | 21.2  | 21        | 15.8  | 11        | 12.2  | 4         | 12.1  | 57        | 33.9  | 170          | 20.7  |
| Potential cut marks     | 0          | 0.0   | 0          | 0.0   | 0        | 0.0   | 0         | 0.0   | 1         | 0.8   | 1         | 1.1   | 1         | 3.0   | 3         | 1.8   | 6            | 0.7   |
| Bone tools              | 1          | 1.4   | 0          | 0.0   | 0        | 0.0   | 2         | 0.9   | 2         | 1.5   | 0         | 0.0   | 0         | 0.0   | 1         | 0.6   | 6            | 0.7   |
| Potential bone tools    | 0          | 0.0   | 0          | 0.0   | 1        | 1.0   | 3         | 1.3   | 0         | 0.0   | 0         | 0.0   | 0         | 0.0   | 2         | 1.2   | 6            | 0.7   |
| <b>Total</b>            | 72         | 100.0 | 15         | 100.0 | 96       | 100.0 | 226       | 100.0 | 133       | 100.0 | 90        | 100.0 | 33        | 100.0 | 168       | 100.0 | 833          | 100.0 |

**Table S9.** MP ungulate remains (NISP) from Ghar-e Boof. NISP values, and specimens with cut marks (CMs) and percussion (P) damage (N) by element and body size groups (all MP layers combined). In order to provide a more robust sample, the relative proportions (%) of anthropogenic modifications by element are shown only for all the ungulate remains combined, including specimens assigned to intermediate categories (e.g., small/medium ungulate). Tooth specimens are excluded.

| Elements            | Small ungulate |     |   | Medium ungulate |     |    | Large ungulate |     |   | Very-large ungulates |     |   | Total |     |       |    |      |
|---------------------|----------------|-----|---|-----------------|-----|----|----------------|-----|---|----------------------|-----|---|-------|-----|-------|----|------|
|                     | NISP           | CMs | P | NISP            | CMs | P  | NISP           | CMs | P | NISP                 | CMs | P | NISP  | CMs | %     | P  | %    |
| <b>Cranial</b>      |                |     |   |                 |     |    |                |     |   |                      |     |   |       |     |       |    |      |
| Horn                | 1              | 0   | 0 | 0               | 0   | 0  | 0              | 0   | 0 | 0                    | 0   | 0 | 4     | 0   | 0.0   | 0  | 0.0  |
| Cranium             | 4              | 0   | 0 | 37              | 1   | 0  | 0              | 0   | 0 | 0                    | 0   | 0 | 52    | 3   | 5.8   | 0  | 0.0  |
| Mandible            | 2              | 1   | 1 | 20              | 3   | 0  | 0              | 0   | 0 | 1                    | 0   | 0 | 27    | 5   | 18.5  | 1  | 3.7  |
| Hyoid               | 0              | 0   | 0 | 1               | 0   | 0  | 1              | 0   | 0 | 0                    | 0   | 0 | 2     | 0   | 0.0   | 0  | 0.0  |
| Subtotal            | 7              | 1   | 1 | 58              | 4   | 0  | 1              | 0   | 0 | 1                    | 0   | 0 | 85    | 8   | 9.4   | 1  | 1.2  |
| <b>Axial</b>        |                |     |   |                 |     |    |                |     |   |                      |     |   |       |     |       |    |      |
| Atlas               | 0              | 0   | 0 | 0               | 0   | 0  | 0              | 0   | 0 | 0                    | 0   | 0 | 0     | 0   | 0.0   | 0  | 0.0  |
| Axis                | 0              | 0   | 0 | 0               | 0   | 0  | 0              | 0   | 0 | 0                    | 0   | 0 | 0     | 0   | 0.0   | 0  | 0.0  |
| Cervical vertebra   | 0              | 0   | 0 | 1               | 0   | 0  | 0              | 0   | 0 | 0                    | 0   | 0 | 1     | 0   | 0.0   | 0  | 0.0  |
| Thoracic vertebra   | 0              | 0   | 0 | 0               | 0   | 0  | 0              | 0   | 0 | 0                    | 0   | 0 | 3     | 0   | 0.0   | 0  | 0.0  |
| Lumbar vertebra     | 0              | 0   | 0 | 2               | 0   | 0  | 0              | 0   | 0 | 0                    | 0   | 0 | 3     | 0   | 0.0   | 0  | 0.0  |
| Rib                 | 2              | 1   | 0 | 4               | 0   | 0  | 1              | 0   | 0 | 0                    | 0   | 0 | 11    | 3   | 27.3  | 0  | 0.0  |
| Innominate          | 0              | 0   | 0 | 1               | 0   | 0  | 0              | 0   | 0 | 0                    | 0   | 0 | 1     | 0   | 0.0   | 0  | 0.0  |
| Subtotal            | 2              | 1   | 0 | 8               | 0   | 0  | 1              | 0   | 0 | 0                    | 0   | 0 | 19    | 3   | 15.8  | 0  | 0.0  |
| <b>Appendicular</b> |                |     |   |                 |     |    |                |     |   |                      |     |   |       |     |       |    |      |
| Scapula             | 0              | 0   | 0 | 1               | 1   | 0  | 0              | 0   | 0 | 1                    | 0   | 1 | 2     | 1   | 50.0  | 1  | 50.0 |
| Humerus             | 3              | 1   | 1 | 29              | 6   | 3  | 0              | 0   | 0 | 0                    | 0   | 0 | 33    | 8   | 24.2  | 5  | 15.6 |
| Radius              | 4              | 2   | 0 | 32              | 9   | 4  | 1              | 1   | 0 | 0                    | 0   | 0 | 38    | 12  | 31.6  | 4  | 10.5 |
| Ulna                | 0              | 0   | 0 | 12              | 1   | 0  | 0              | 0   | 0 | 0                    | 0   | 0 | 12    | 1   | 8.3   | 0  | 0.0  |
| Carpals             | 0              | 0   | 0 | 3               | 0   | 0  | 0              | 0   | 0 | 0                    | 0   | 0 | 4     | 0   | 0.0   | 0  | 0.0  |
| Metacarpal          | 3              | 0   | 0 | 2               | 1   | 0  | 0              | 0   | 0 | 0                    | 0   | 0 | 5     | 1   | 20.0  | 0  | 0.0  |
| Femur               | 4              | 2   | 1 | 24              | 9   | 3  | 0              | 0   | 0 | 1                    | 1   | 1 | 29    | 12  | 41.4  | 5  | 17.9 |
| Patella             | 0              | 0   | 0 | 0               | 0   | 0  | 0              | 0   | 0 | 0                    | 0   | 0 | 0     | 0   | 0.0   | 0  | 0.0  |
| Tibia               | 2              | 1   | 0 | 61              | 16  | 10 | 3              | 1   | 1 | 1                    | 0   | 1 | 69    | 18  | 26.1  | 13 | 18.8 |
| Tarsals             | 0              | 0   | 0 | 1               | 0   | 0  | 0              | 0   | 0 | 0                    | 0   | 0 | 1     | 0   | 0.0   | 0  | 0.0  |
| Astragalus          | 0              | 0   | 0 | 2               | 1   | 0  | 0              | 0   | 0 | 0                    | 0   | 0 | 2     | 1   | 50.0  | 0  | 0.0  |
| Calcaneus           | 0              | 0   | 0 | 1               | 1   | 0  | 0              | 0   | 0 | 0                    | 0   | 0 | 1     | 1   | 100.0 | 0  | 0.0  |
| Metatarsal          | 2              | 0   | 1 | 10              | 2   | 3  | 0              | 0   | 0 | 0                    | 0   | 0 | 13    | 2   | 15.4  | 4  | 30.8 |
| Subtotal            | 18             | 6   | 3 | 178             | 47  | 23 | 4              | 2   | 1 | 3                    | 1   | 3 | 209   | 57  | 27.3  | 32 | 15.3 |

**Table S9.** Continued.

| Elements               | Small ungulate |           |          | Medium ungulate |            |           | Large ungulate |          |          | Very-large ungulates |          |          | Total      |            |             |           |             |
|------------------------|----------------|-----------|----------|-----------------|------------|-----------|----------------|----------|----------|----------------------|----------|----------|------------|------------|-------------|-----------|-------------|
|                        | NISP           | CMs       | P        | NISP            | CMs        | P         | NISP           | CMs      | P        | NISP                 | CMs      | P        | NISP       | CMs        | %           | P         | %           |
| <b>Feet</b>            |                |           |          |                 |            |           |                |          |          |                      |          |          |            |            |             |           |             |
| Sesamoid               | 2              | 0         | 0        | 25              | 0          | 0         | 0              | 0        | 0        | 0                    | 0        | 0        | 28         | 0          | 0.0         | 0         | 0.0         |
| First phalanx          | 4              | 0         | 0        | 12              | 1          | 0         | 1              | 0        | 0        | 0                    | 0        | 0        | 17         | 1          | 5.9         | 0         | 0.0         |
| Second phalanx         | 3              | 1         | 0        | 10              | 4          | 0         | 0              | 0        | 0        | 0                    | 0        | 0        | 14         | 5          | 35.7        | 0         | 0.0         |
| Third phalanx          | 1              | 0         | 0        | 3               | 0          | 0         | 0              | 0        | 0        | 0                    | 0        | 0        | 4          | 0          | 0.0         | 0         | 0.0         |
| Subtotal               | 10             | 1         | 0        | 50              | 5          | 0         | 1              | 0        | 0        | 0                    | 0        | 0        | 63         | 6          | 9.5         | 0         | 0.0         |
| <b>Others</b>          |                |           |          |                 |            |           |                |          |          |                      |          |          |            |            |             |           |             |
| Unknown long bone      | 17             | 12        | 1        | 139             | 60         | 27        | 15             | 4        | 3        | 1                    | 0        | 0        | 185        | 80         | 43.2        | 33        | 17.8        |
| Flat bone              | 0              | 0         | 0        | 2               | 0          | 0         | 1              | 0        | 0        | 0                    | 0        | 0        | 6          | 1          | 16.7        | 0         | 0.0         |
| Unknown vertebra       | 0              | 0         | 0        | 3               | 0          | 0         | 0              | 0        | 0        | 0                    | 0        | 0        | 4          | 0          | 0.0         | 0         | 0.0         |
| Unknown carpal/ tarsal | 0              | 0         | 0        | 1               | 1          | 0         | 0              | 0        | 0        | 0                    | 0        | 0        | 1          | 1          | 100.0       | 0         | 0.0         |
| Unknown metapodial     | 6              | 2         | 0        | 19              | 4          | 1         | 0              | 0        | 0        | 0                    | 0        | 0        | 30         | 7          | 23.3        | 1         | 3.3         |
| Unknown phalanx        | 0              | 0         | 0        | 1               | 0          | 0         | 0              | 0        | 0        | 0                    | 0        | 0        | 2          | 0          | 0.0         | 0         | 0.0         |
| Subtotal               | 23             | 14        | 1        | 165             | 65         | 28        | 16             | 4        | 3        | 1                    | 0        | 0        | 228        | 89         | 39.0        | 34        | 14.9        |
| <b>Total</b>           | <b>60</b>      | <b>23</b> | <b>5</b> | <b>459</b>      | <b>121</b> | <b>51</b> | <b>23</b>      | <b>6</b> | <b>4</b> | <b>5</b>             | <b>1</b> | <b>3</b> | <b>604</b> | <b>163</b> | <b>27.0</b> | <b>67</b> | <b>11.1</b> |

6/8 - 929  
AH VI

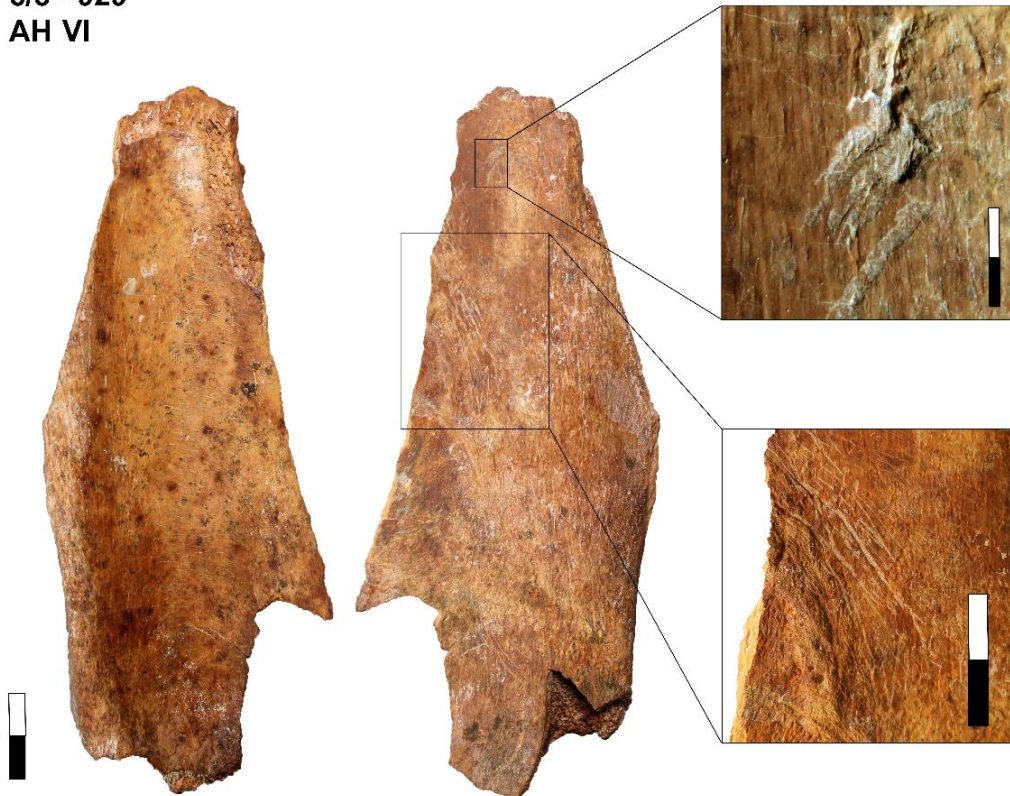

**Fig. S5.** Scapula of an aurochs recovered from the MP sequence of Ghar-e Boof, which has a percussion impact and longitudinal scraping. Scale: general view = 20 mm; closer-up view = 2 mm.

a 6/8 - 730  
AH Vb

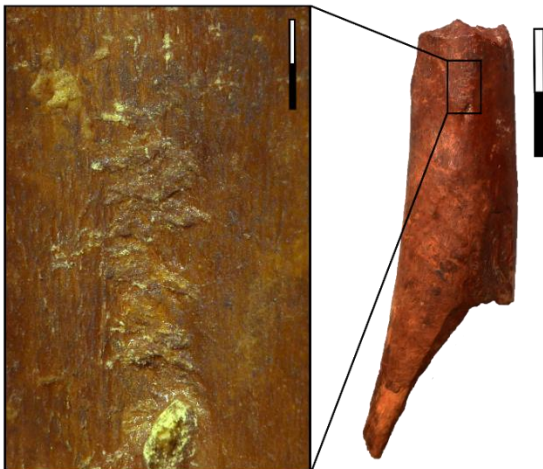

b 6/8 - 878  
AH IV

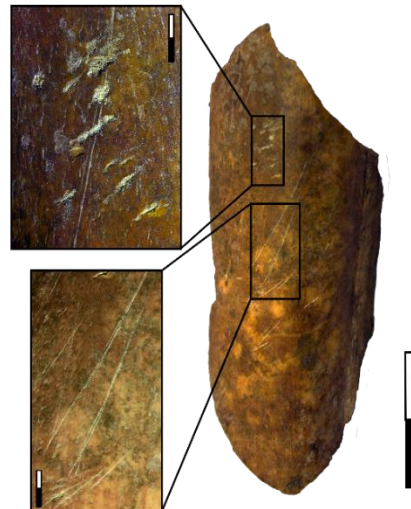

**Fig. S6.** Bone retouchers from the MP sequence of Ghar-e Boof: a) medium ungulate humerus with retouching marks; and B) medium ungulate femur with cut marks/scraping and retouching marks. Scale: general view = 10 mm; closer-up view = 2 mm.

**Table S10.** MP carnivore and small game remains from Ghar-e Boof. Skeletal elements (data in NISP) by taxon or body size group (all layers combined)

| Elements                | Carnivores                       |                 |                                        | Tortoise                       | Birds        |                                           |             | Total      |
|-------------------------|----------------------------------|-----------------|----------------------------------------|--------------------------------|--------------|-------------------------------------------|-------------|------------|
|                         | Red fox ( <i>Vulpes vulpes</i> ) | Large carnivore | Leopard ( <i>Panthera cf. pardus</i> ) | Tortoise ( <i>Testudo</i> sp.) | Medium birds | Partridge ( <i>Alectoris cf. chukar</i> ) | Large birds | Total      |
| <b>Cranial</b>          |                                  |                 |                                        |                                |              |                                           |             |            |
| Cranium                 | 0                                | 0               | 0                                      | 0                              | 3            | 0                                         | 0           | 3          |
| Indet. canine           | 0                                | 1               | 0                                      | NA*                            | NA*          | NA*                                       | NA*         | 1          |
| Upper molar             | 1                                | 0               | 0                                      | NA*                            | NA*          | NA*                                       | NA*         | 1          |
| Subtotal                | 1                                | 1               | 0                                      | 0                              | 3            | 0                                         | 0           | 5          |
| <b>Axial</b>            |                                  |                 |                                        |                                |              |                                           |             |            |
| Axis                    | 0                                | 0               | 0                                      | 0                              | 1            | 0                                         | 0           | 1          |
| Cervical vertebra       | 0                                | 0               | 0                                      | 0                              | 3            | 0                                         | 0           | 3          |
| Thoracic vertebra       | 0                                | 0               | 0                                      | 0                              | 1            | 0                                         | 0           | 1          |
| Pelvic girdle           | 0                                | 0               | 0                                      | 1                              | 2            | 0                                         | 0           | 3          |
| Furculum                | NA*                              | NA*             | NA*                                    | NA*                            | 2            | 0                                         | 0           | 2          |
| Subtotal                | 0                                | 0               | 0                                      | 1                              | 9            | 0                                         | 0           | 10         |
| <b>Appendicular</b>     |                                  |                 |                                        |                                |              |                                           |             |            |
| Coracoid                | NA*                              | NA*             | NA*                                    | 1                              | 1            | 1                                         | 0           | 3          |
| Scapula                 | 0                                | 0               | 0                                      | 1                              | 1            | 0                                         | 0           | 2          |
| Humerus                 | 0                                | 0               | 0                                      | 5                              | 1            | 2                                         | 0           | 8          |
| Radius                  | 0                                | 0               | 1                                      | 0                              | 1            | 1                                         | 0           | 3          |
| Ulna                    | 0                                | 0               | 0                                      | 0                              | 2            | 1                                         | 0           | 3          |
| Carpometacarpus         | NA*                              | NA*             | NA*                                    | NA*                            | 3            | 1                                         | 0           | 4          |
| Femur                   | 0                                | 0               | 0                                      | 2                              | 3            | 1                                         | 0           | 6          |
| Tibia                   | 0                                | 0               | 0                                      | 2                              | NA*          | NA*                                       | NA*         | 2          |
| Tibiotarsus             | NA*                              | NA*             | NA*                                    | NA*                            | 5            | 4                                         | 1           | 10         |
| Fibula                  | 0                                | 0               | 0                                      | 0                              | 1            | 0                                         | 0           | 1          |
| Tarsometatarsus         | NA*                              | NA*             | NA*                                    | NA*                            | 4            | 1                                         | 0           | 5          |
| Indet. long bone        | 0                                | 0               | 0                                      | 1                              | 2            | 0                                         | 0           | 3          |
| Subtotal                | 0                                | 0               | 1                                      | 12                             | 433          | 12                                        | 1           | 50         |
| <b>Phalanges</b>        |                                  |                 |                                        |                                |              |                                           |             |            |
| 1 <sup>st</sup> phalanx | 0                                | 0               | 3                                      | 0                              | 11           | 0                                         | 0           | 14         |
| 2 <sup>nd</sup> phalanx | 0                                | 0               | 1                                      | 0                              | 0            | 0                                         | 1           | 2          |
| 3 <sup>rd</sup> phalanx | 0                                | 0               | 0                                      | 0                              | 1            | 0                                         | 0           | 1          |
| Subtotal                | 0                                | 0               | 4                                      | 0                              | 12           | 0                                         | 1           | 17         |
| <b>Shell fragments</b>  |                                  |                 |                                        |                                |              |                                           |             |            |
| Carapace & Plastron     | NA*                              | NA*             | NA*                                    | 148                            | NA*          | NA*                                       | NA*         | 148        |
| <b>Others</b>           |                                  |                 |                                        |                                |              |                                           |             |            |
| Unknown                 | 0                                | 0               | 0                                      | 0                              | 1            | 0                                         | 0           | 1          |
| <b>Total</b>            | <b>1</b>                         | <b>1</b>        | <b>5</b>                               | <b>161</b>                     | <b>49</b>    | <b>12</b>                                 | <b>2</b>    | <b>231</b> |

NA\* (Not Applicable).

## References:

1. Blanco-Lapaz, A., Mata-González, M., Starkovich, B. M., Zeidi, M. & Conard, N. J. Late Pleistocene environments in the southern Zagros of Iran and their implications for human evolution. *Archaeol. Anthropol. Sci.* **14**, 161; <https://doi.org/10.1007/s12520-022-01615-1> (2022).
2. Emerson, A. M. The role of body part utility in small-scale hunting under two strategies of carcass recovery in *From Bones to Behavior. Ethnoarchaeological and Experimental Contributions to the Interpretation of Faunal Remains* (ed. Hudson, J.) 138–155 (Center for Archaeological Investigation. Southern Illinois University, 1993).
3. Metcalfe, D. & Jones, K. T. A reconsideration of animal body-part utility indices. *Am. Antiq.* **53**, 486–504; <https://doi.org/10.2307/281213> (1988).
4. Morin, E. Fat composition and Nunamiut decision-making: a new look at the marrow and bone grease indices. *J. Archaeol. Sci.* **34**, 69–82; <https://doi.org/10.1016/j.jas.2006.03.015> (2007).
